# Supplementary material for: Highly proton conducting fluorinated sulfonated poly(arylene ether sulfone) copolymers with side chain grafting
Source: Royal Society of Chemistry journal article supplement (doi:10.1039/c4ra07291j), 2014-01-01
Supplement: c4ra07291j1.pdf [file c4ra07291j1.pdf]

## Electronic Supporting Information

### High proton conducting fluorinated sulfonated poly(arylene ether sulfone)s copolymers with side chain grafting

Rajdeep Mukherjee<sup>a</sup>, Susanta Banerjee<sup>a\*</sup>, Hartmut Komber<sup>b</sup> and Brigitte Voit<sup>b</sup>

<sup>a</sup>Materials Science Centre, Indian Institute of Technology, Kharagpur 721302, India

<sup>b</sup>Leibniz-Institut für Polymerforschung Dresden e.V., Hohe Strasse. 6, 01067, Dresden, Germany

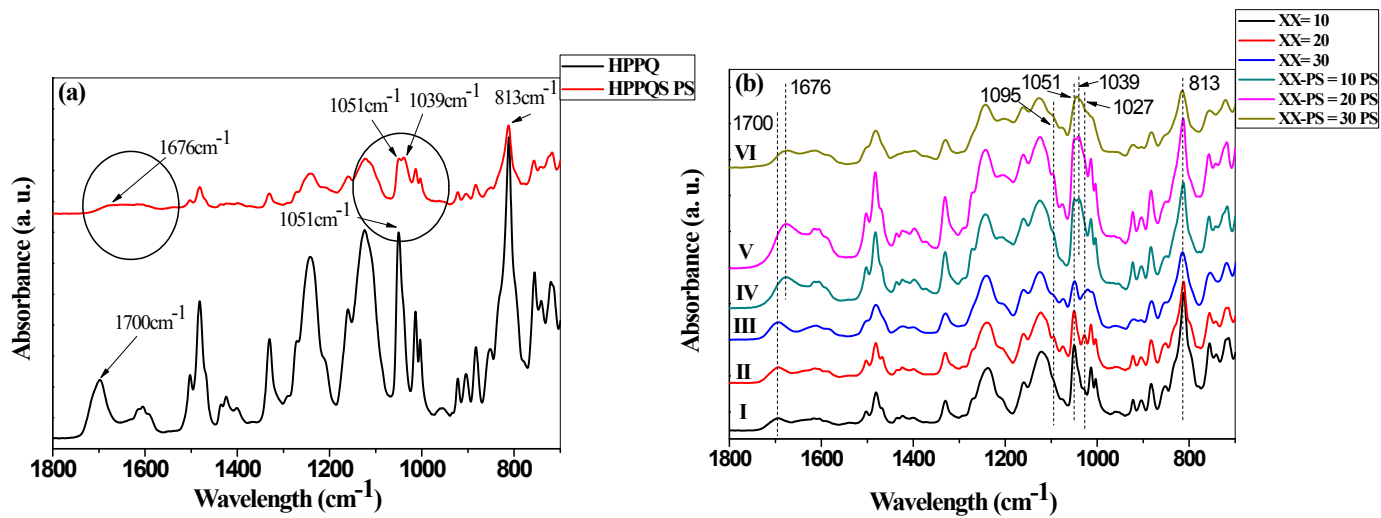

**Figure S1.** FT-IR spectra a) of homopolymer PTAQ and its post sulfonated form HPPQS PS, b) of HPPQS-XX and HPPQS-XX PS copolymers with different degree of sulfonation.

### 3,3'-Bis(4-hydroxyphenyl)-1-isobenzopyrrolidone (HPP)

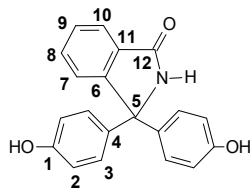

$^1\text{H}$  NMR (DMSO- $d_6$ , 30°C): 9.47 (s, 1H, NH), 9.42 (s, 2H, OH), 7.67 (d, 1H, 10), 7.58 (t, 1H, 8), 7.52 (d, 1H, 7), 7.47 (t, 1H, 9), 7.03 (d, 4H, 3), 6.69 ppm (d, 4H, 2).

$^{13}\text{C}$  NMR (DMSO- $d_6$ , 60°C): 168.28 (12), 156.62 (1), 150.97 (6), 133.80 (4), 131.80 (8), 131.11(11), 128.17 (3), 128.07 (9), 124.66 (7), 123.11 (10), 114.93 (2), 69.45 ppm (5).



### HPPQSH PS (partially alkylated)

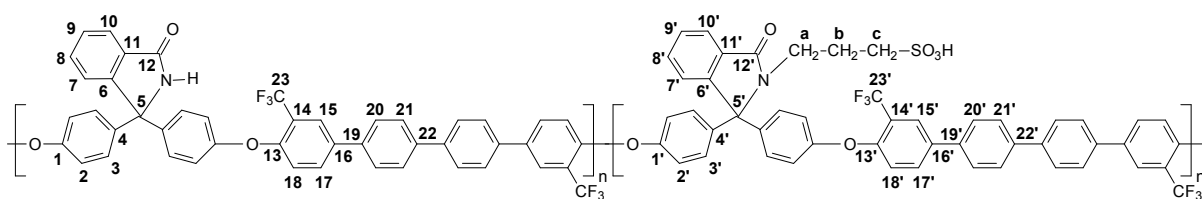

$^1\text{H}$  NMR (DMSO- $d_6$ ,  $90^\circ\text{C}$ ): 9.45 (NH), 8.02 (15), 8.00 (15'), 7.99 (17'), 7.96 (17), 7.84 (21), 7.82 (20), 7.79 (10'), 7.75 (10), 7.67 (7,8), 7.61 (8'), 7.56 (9), 7.53 (9'), 7.50 (7'), 7.40 (3), 7.31 (3'), 7.29 (18'), 7.17 (18), 7.14 (2'), 7.10 (2), 3.55 (a), 2.27 (c), 1.38 ppm (b).

$^{13}\text{C}$  NMR (DMSO- $d_6$ ,  $60^\circ\text{C}$ ): 168.1 (12), 166.8 (12'), 155.6 (1'), 155.3 (1), 153.8 (13'), 153.6 (13), 150.2 (6'), 149.7 (6), 138.9 (4), 138.7 (22,22'), 137.2 (19'), 137.1 (19), 136.4 (4'), 135.1 (16), 134.9 (16'), 132.5 (17'), 132.3 (8'), 132.2 (17), 132.0 (8), 131.0 (11), 130.3 (11'), 129.6 (3'), 128.8 (3), 128.4 (9,9'), 127.1 (20,20'), 127.0 (21,21'), 124.8 (15), 124.6 (7,15'), 123.6 (7'), 123.2 (10), 123.1 (23; q,  $^1J_{\text{CF}} = 273$  Hz), 122.8 (10'), 120.4 (18'), 120.2 (18), 120.0 (14,14'), 119.3 (2'), 118.5 (2), 69.2 (5), 68.9 (5'), 49.3 (c), 40.5 (a), 23.7 ppm (b).

$^{19}\text{F}$  NMR (DMSO- $d_6$ ,  $90^\circ\text{C}$ ): -60.1 ppm (23).

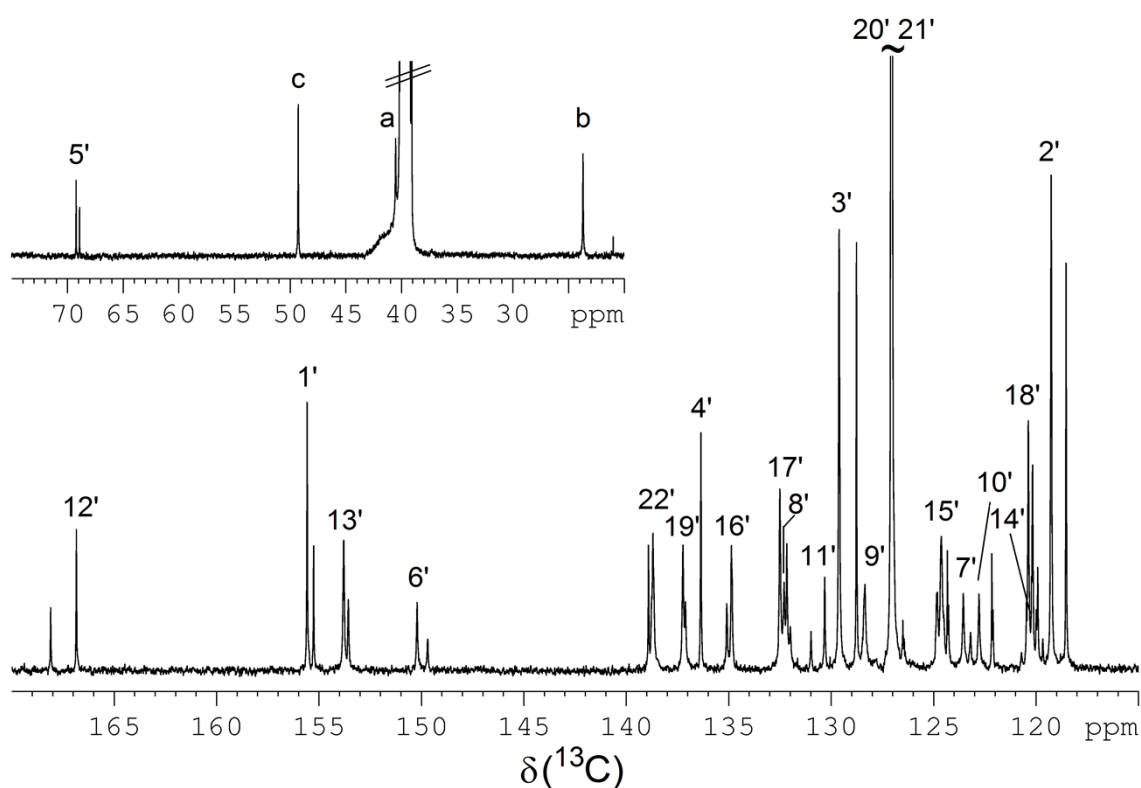

**Figure S3.**  $^{13}\text{C}$  NMR spectrum of HPPQSH PS ( $60^\circ\text{C}$ , DMSO- $d_6$ ). Only the new signals resulting from partial alkylation are labelled.

The  $^1\text{H}$  NMR spectrum is depicted in the main part: Figure 1b.

## HPPQSH-XX

The  $^1\text{H}$  NMR spectra of **HPPQSH-10**, **-20**, and **-30** are given in the main part: Figures 2a-c.

The  $^{13}\text{C}$  NMR spectrum is given in the main part: Figure 3.

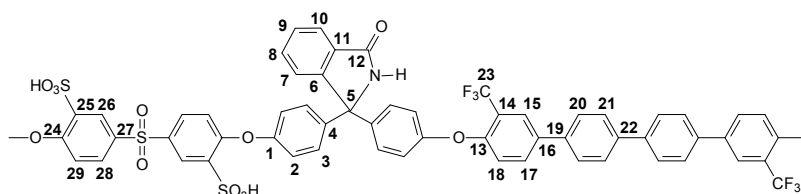

The formula depicts a structural fragment with atom numbering.

The 3,3'-bis(4-hydroxyphenyl)-1-isobenzopyrrolidone (HPP) unit can be bonded to 4,4'-bis(3'-trifluoromethyl benzyl) biphenyl (QB) and to 3,3'-disodiumsulfonyl-diphenylsulfone (SDSP) units resulting in two different dyads – QB-HPP (\*) and SDSP-HPP (#) – and three different HPP-centred triads: QB-HPP-QP (**I**), QP-HPP-SDSP (**II**), and SDSP-HPP-SDSP (**III**).

$^1\text{H}$  NMR (DMSO- $d_6$ , 90°C): 9.45 (NH<sup>I</sup>), 9.41 (NH<sup>II</sup>), 9.38 (NH<sup>III</sup>), 8.34 (26), 8.02 (15), 7.97 (17), 7.85-7.78 (20,21,28), 7.75 (10), 7.66 (7,8), 7.54 (9), 7.39 (3\*), 7.31 (3#), 7.17 (18), 7.09 (2\*), 7.01 (2#), 6.94 ppm (29).

$^{13}\text{C}$  NMR (DMSO- $d_6$ , 60°C): 168.2 (12), 157.8 (24), 155.35 (1\*), 155.2 (1#), 153.6 (13), 149.9 (6<sup>III</sup>), 149.8 (6<sup>II</sup>), 149.7 (6<sup>I</sup>), 139.7-139.3 (25), 139.2-138.5 (4), 138.7 (22), 137.2 (19), 135.1 (16), 134.4 (27), 132.2 (17), 132.0 (8), 131.0 (11), 129.5 (28), 128.8 (3\*), 128.5 (3#), 128.5-128.0 (9,26), 127.1 (20), 127.0 (21), 124.9 (15), 124.6 (7), 123.2 (10), 123.1 (23; q,  $^1J_{\text{CF}} = 273$  Hz), 120.4 (14; q,  $^2J_{\text{CF}} = 31$  Hz), 120.2 (18), 119.6 (2#), 119.5 (29), 118.6 (2\*), 69.3 ppm (5).

$^{19}\text{F}$  NMR (DMSO- $d_6$ , 90°C): -60.1 ppm (23).

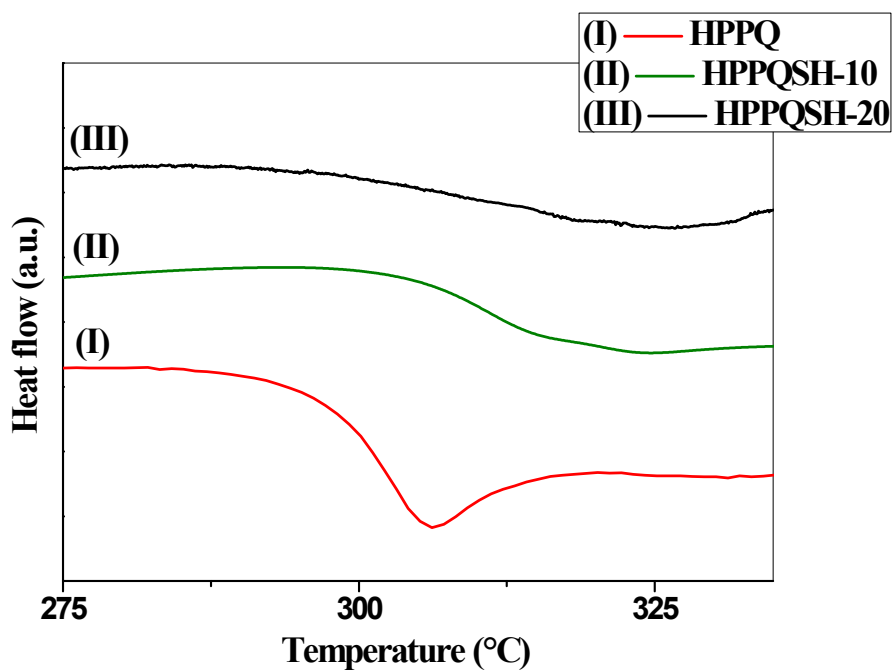

Figure S4. DSC plot of the HPPQSH-XX membranes.

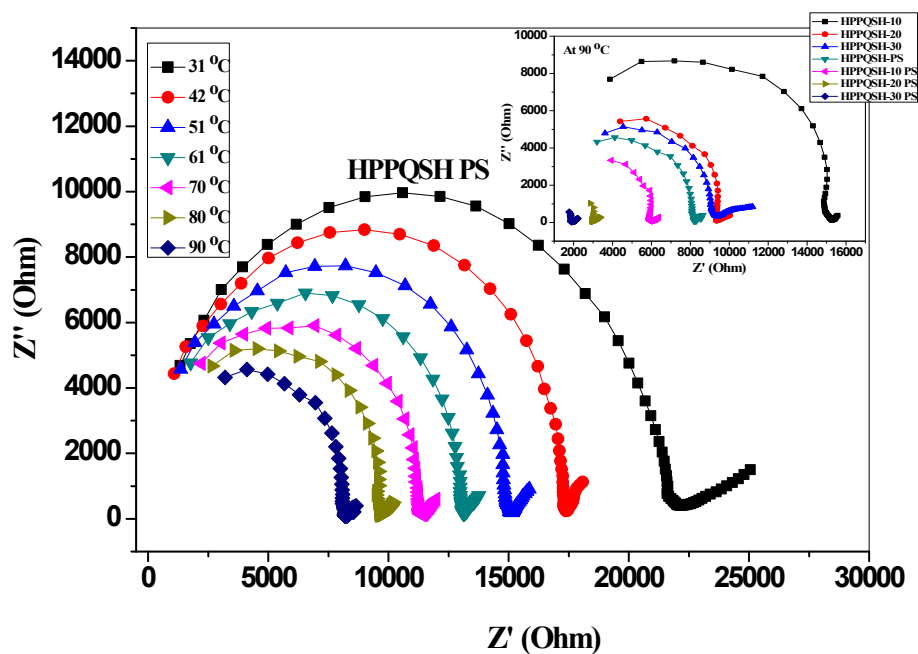

Figure S5. Complex impedance spectra of HPPQSH-PS membrane at different temperature and all copolymer membranes at fixed temperature.
